# Supplementary material for: Understanding the morphological evolution of anodic tantalum oxide nanostructures in acidic medium
Source: Royal Society of Chemistry journal article supplement (doi:10.1039/d4ma00458b), 2024-01-01
Supplement: d4ma00458b1.pdf [file d4ma00458b1.pdf]

Supporting information

## Understanding the Morphological Evolution of Anodic Tantalum Oxide Nanostructures in Acidic Medium

Biswaranjan D. Mohapatra<sup>\*,1</sup>, Kinga Pawlik<sup>1</sup>, Izabela Darowska<sup>1</sup>, Łukasz Gondek<sup>2</sup>, Marcin Pisarek<sup>3</sup> and Grzegorz D. Sulka<sup>\*,1</sup>

<sup>1</sup> Department of Physical Chemistry & Electrochemistry, Faculty of Chemistry, Jagiellonian University, Gronostajowa 2, 30-387 Krakow, Poland

<sup>2</sup> Faculty of Physics and Applied Computer Science, AGH University of Krakow, Mickiewicza 30, 30-059 Krakow, Poland

<sup>3</sup> Laboratory of Surface Analysis, Institute of Physical Chemistry, Polish Academy of Sciences, Kasprzaka 44/52, Warsaw 01-224, Poland

Email: biswaranjan.mohapatra@uj.edu.pl; sulka@chemia.uj.edu.pl

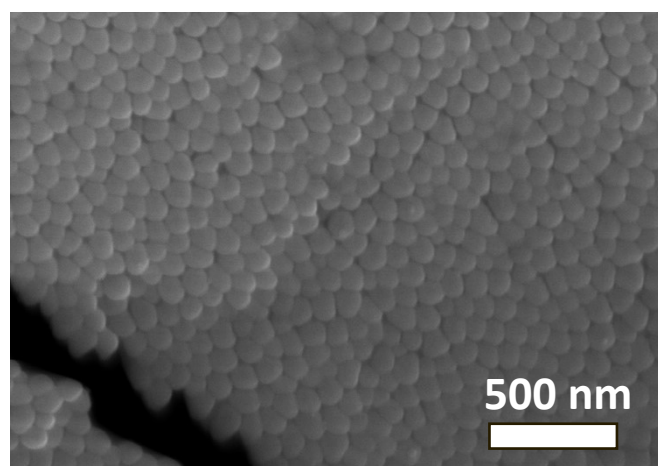

**Figure S1:** SEM image showing the bottom layer of the ATO nanotubes produced at 40 V for 15 min in electrolyte containing 90 ml H<sub>2</sub>SO<sub>4</sub> (95 wt.%) + 6 ml HF (40 wt.%) + 4 ml H<sub>2</sub>O at 23°C.

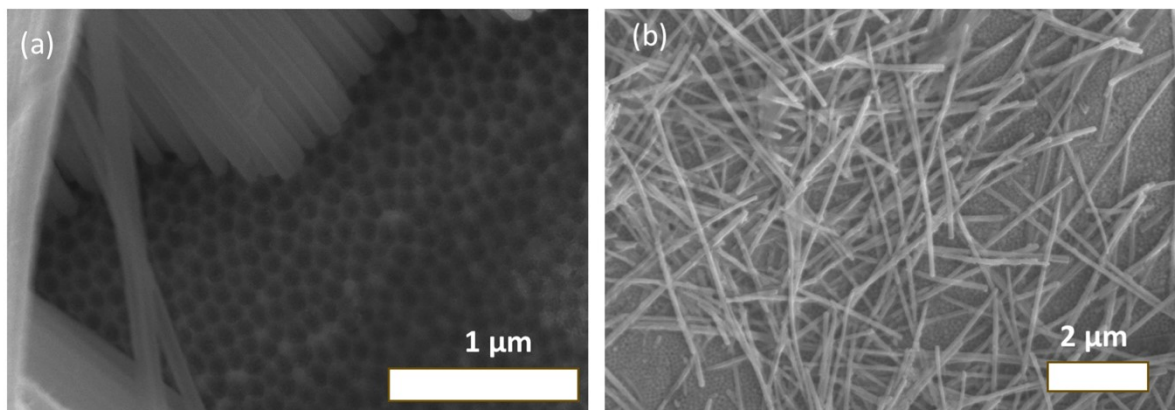

**Figure S2:** SEM image showing (a) the nano-dimple layer on the Ta surface after the removal of ATO nanotubes (b) the freestanding ATO nanotubes produced at 40 V for 4 min in electrolyte containing 90 ml H<sub>2</sub>SO<sub>4</sub> (95 wt.%) + 6 ml HF (40 wt.%) + 4 ml H<sub>2</sub>O at 23°C.

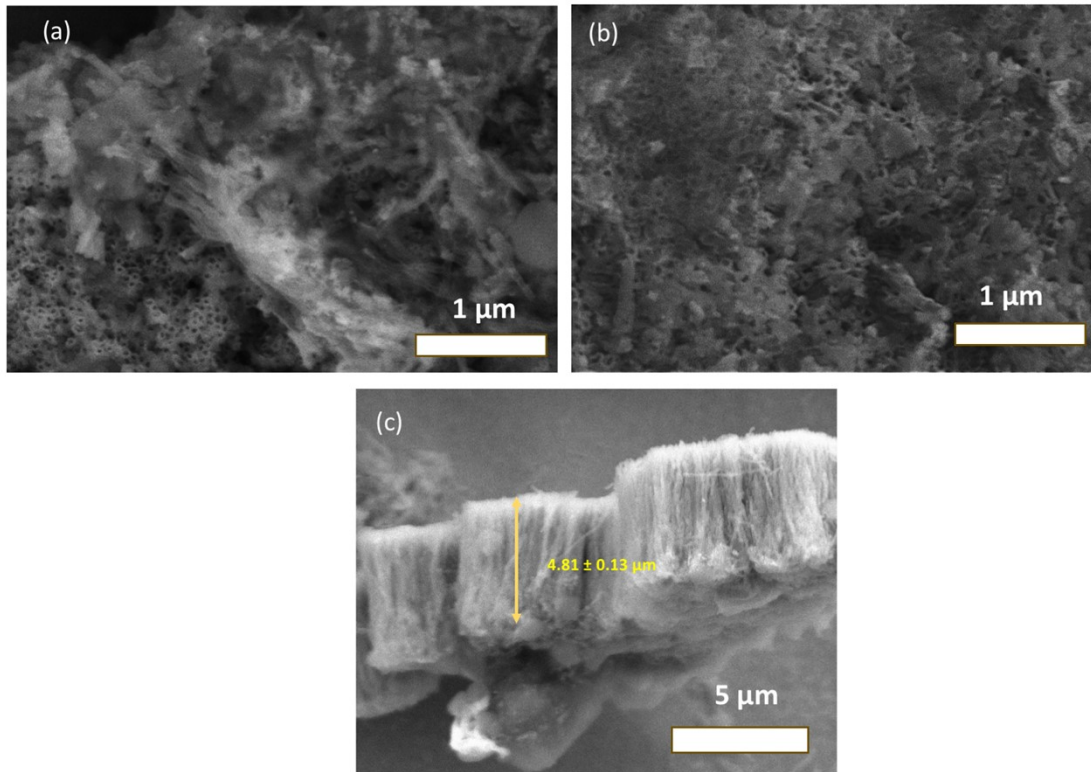

**Figure S3.** Top SEM image view of ATO structures produced at 80 V for (a) 2 min and (b) 4 min in electrolyte containing 90 ml H<sub>2</sub>SO<sub>4</sub> (95 wt.%) + 6 ml HF (40 wt.%) + 4 ml H<sub>2</sub>O at 23°C. (C) SEM side view image for the ATO structures produced at 80 V for 2 min.

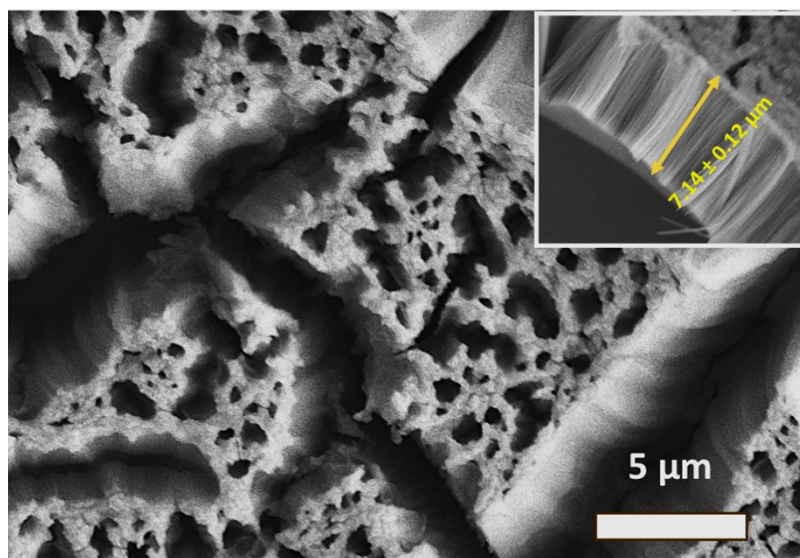

**Figure S4.** Top SEM image view of ATO structures produced at 15 V for 6 hr in electrolyte containing 90 ml H<sub>2</sub>SO<sub>4</sub> (95 wt.%) + 6 ml HF (40 wt.%) + 4 ml H<sub>2</sub>O at 23°C.

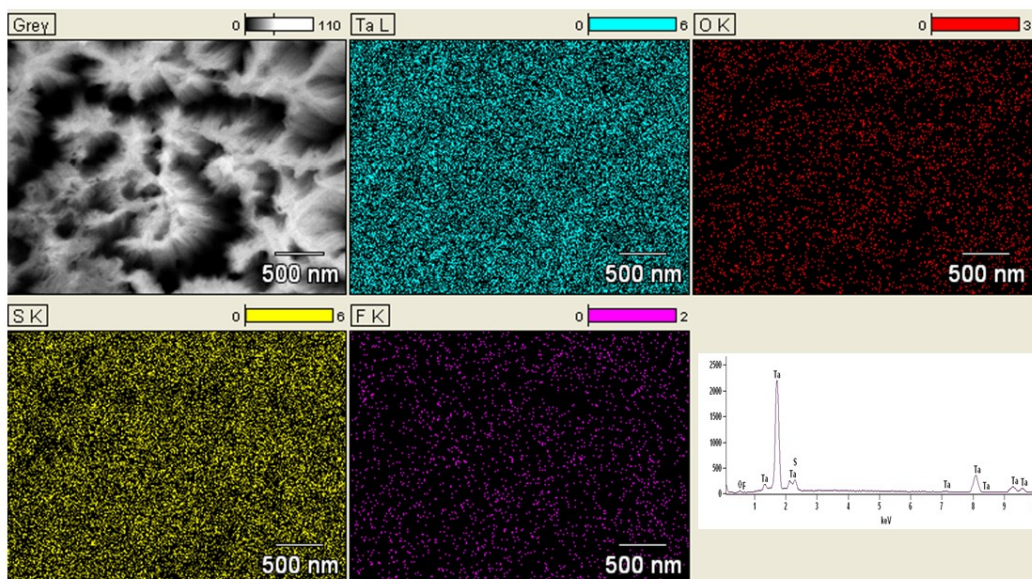

**Figure S5:** Surface morphology, EDS elemental mapping, and corresponding EDX spectrum for self-organized ATO nanotubes formed at 40 V for 4 min in the electrolyte containing 90 ml H<sub>2</sub>SO<sub>4</sub> (95 wt.%) + 6 ml HF (40 wt.%) + 4 ml H<sub>2</sub>O at 23°C.

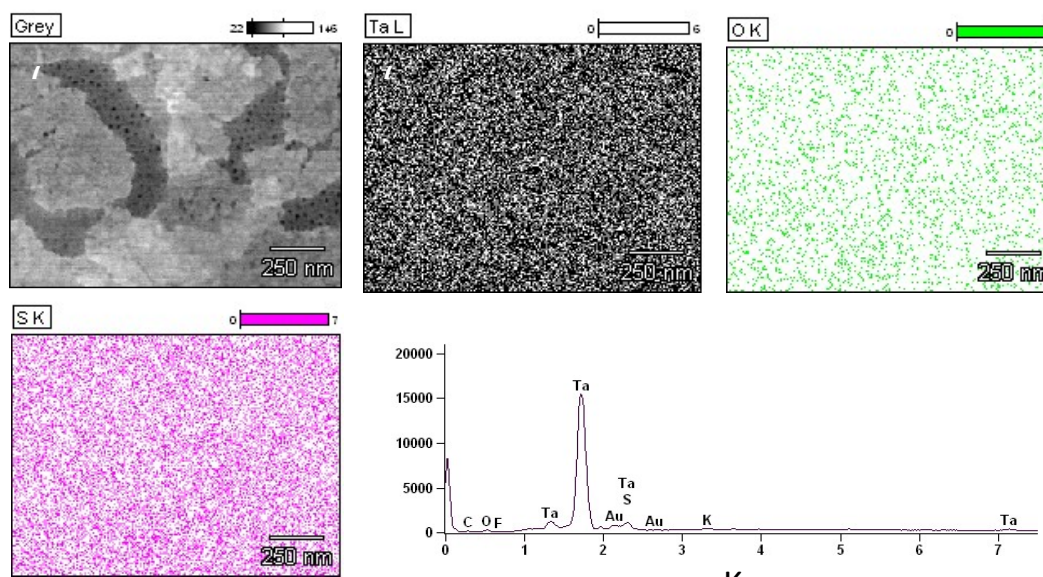

**Figure S6:** Surface morphology, EDS elemental mapping, and corresponding EDX spectrum for self-organized ATO nanotubes formed at 15 V for 15 min in the electrolyte containing 90 ml H<sub>2</sub>SO<sub>4</sub> (95 wt.%) + 6 ml HF (40 wt.%) + 4 ml H<sub>2</sub>O at 23°C.

| Samples | Chemical composition (at. %) |      |      |     |
|---------|------------------------------|------|------|-----|
|         | Ta4f                         | O1s  | S2p  | F1s |
| ATO-15  | 17.9                         | 64.8 | 15.9 | 1.5 |
| ATO-30  | 18.4                         | 64.4 | 15.9 | 1.3 |
| ATO-40  | 14.5                         | 66.2 | 18.3 | 1.0 |

**Table S1.** Chemical composition of ATO produced at 15 (15 min), 30 (4 min) and 40 V (4 min) derived from the XPS results. The samples are abbreviated as ATO-15, ATO-30 and ATO-40, respectively.

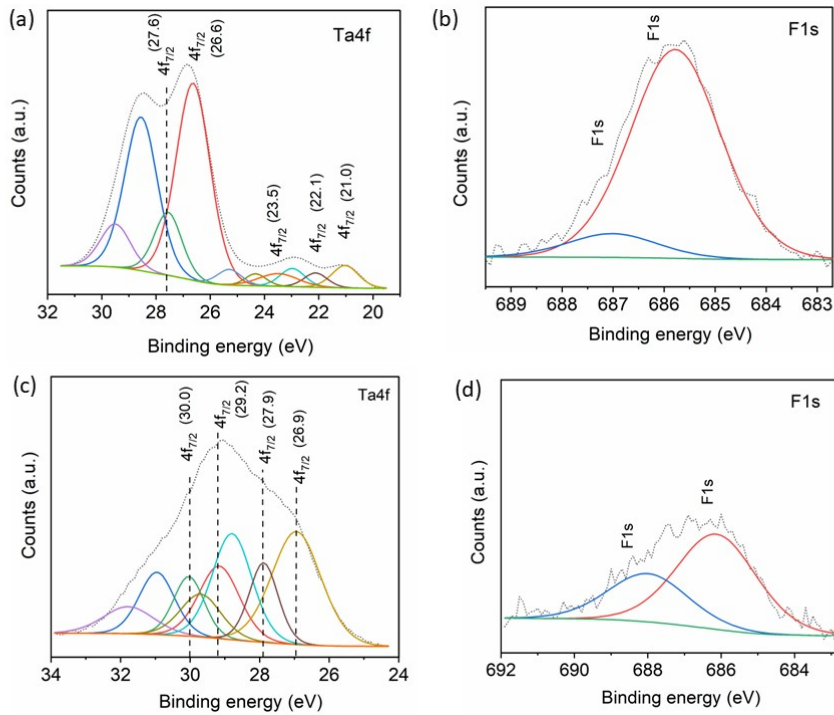

**Figure S7.** Deconvoluted (a) Ta4f and (b) F1s XPS spectra of sample ATO-15. Deconvoluted (c) Ta4f and (d) F1s XPS spectra of sample ATO-40.

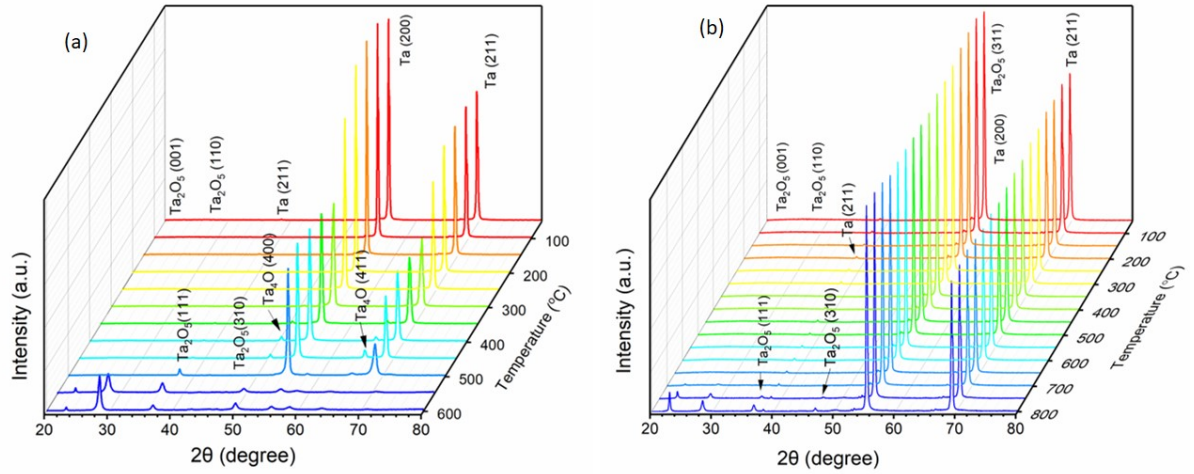

**Figure S8:** Temperature programmed XRD spectra in (a) air and (b) argon atmosphere for ATO structures formed at 40 V for 4 min in a 100 ml of electrolyte containing 90 ml  $\text{H}_2\text{SO}_4$  (95 wt.%) and a 6:4 v/v of HF:H $_2\text{O}$  ratio.
